# Supplementary material
Source: publisher figshare collection journal article supplement (https://rs.figshare.com/ndownloader/files/17842610)
Supplement: Supplementary file 1 [file 17842610]

10	0.99	0.3	-1	1	0.03	0.04	0.4	0.1	25	1	53.168	0.05492
10	0.2	0.6	-1	1	0.03	0.04	0.4	0.7	25	1	47.873	0.03347
10	0.9	0.2	-1	1	0.03	0.04	0.4	0	25	1	49.133	0.06377
10	0.6	0.6	-1	1	0.03	0.04	0.4	0.7	25	1	67.58	0.05828
10	0.01	0.5	-1	1	0.03	0.04	0.4	0.5	25	1	44.414	0.04425
10	0.7	0.6	-1	1	0.03	0.04	0.4	0.7	25	1	73.334	0.06192
10	0.01	0.6	-1	1	0.03	0.04	0.4	0.9	25	1	36.011	0.00415
10	0.8	0.6	-1	1	0.03	0.04	0.4	0.7	25	1	80.442	0.06939
10	0.01	0.5	-1	1	0.03	0.04	0.4	0.4	25	1	46.295	0.05687
10	0.7	0.2	-1	1	0.03	0.04	0.4	0	25	1	51.499	0.07642
10	0.7	0.3	-1	1	0.03	0.04	0.4	0.1	25	1	56.218	0.07652
10	0.6	0.2	-1	1	0.03	0.04	0.4	0	25	1	52.452	0.08326
10	0.01	0.6	-1	1	0.03	0.04	0.4	0.8	25	1	38.117	0.01022
10	0.01	0.6	-1	1	0.03	0.04	0.4	0.7	25	1	39.98	0.01744
10	0.1	0.6	-1	1	0.03	0.04	0.4	0.8	25	1	42.9	0.01905
10	0.2	0.6	-1	1	0.03	0.04	0.4	0.9	25	1	44.957	0.01693
10	0.2	0.6	-1	1	0.03	0.04	0.4	0.8	25	1	46.566	0.02571
10	0.3	0.6	-1	1	0.03	0.04	0.4	0.9	25	1	49.281	0.02398
10	0.4	0.6	-1	1	0.03	0.04	0.4	0.9	25	1	53.71	0.03
10	0.99	0.2	-1	1	0.03	0.04	0.4	0	25	1	47.123	0.05281
10	0.99	0.6	-1	1	0.03	0.04	0.4	0.7	25	1	95.167	0.08099
10	0.99	0.6	-1	1	0.03	0.04	0.4	0.9	25	1	97.133	0.09539
10	0.3	0.6	-1	1	0.03	0.04	0.4	0.7	25	1	52.108	0.03887
10	0.1	0.6	-1	1	0.03	0.04	0.4	0.7	25	1	44.502	0.02746
10	0.4	0.4	-1	1	0.03	0.04	0.4	0.3	25	1	55.677	0.07525
10	0.5	0.6	-1	1	0.03	0.04	0.4	0.9	25	1	59.375	0.03875
10	0.99	0.3	-1	1	0.03	0.04	0.4	0.2	25	1	54.169	0.06233
10	0.99	0.5	-1	1	0.03	0.04	0.4	0.4	25	1	75.541	0.06618
10	0.5	0.6	-1	1	0.03	0.04	0.4	0.8	25	1	60.751	0.04609
10	0.99	0.4	-1	1	0.03	0.04	0.4	0.3	25	1	63.22	0.06478
10	0.5	0.6	-1	1	0.03	0.04	0.4	0.7	25	1	62.477	0.05139
10	0.4	0.6	-1	1	0.03	0.04	0.4	0.7	25	1	56.496	0.04523
10	0.2	0.3	-1	1	0.03	0.04	0.4	0.2	25	1	51.428	0.08216
10	0.6	0.6	-1	1	0.03	0.04	0.4	0.9	25	1	65.999	0.04836
10	0.99	0.6	-1	1	0.03	0.04	0.4	0.8	25	1	95.6	0.08664
10	0.7	0.6	-1	1	0.03	0.04	0.4	0.9	25	1	71.532	0.05861
10	0.6	0.6	-1	1	0.03	0.04	0.4	0.8	25	1	66.018	0.05243
10	0.9	0.6	-1	1	0.03	0.04	0.4	0.7	25	1	87.222	0.07486
10	0.9	0.5	-1	1	0.03	0.04	0.4	0.4	25	1	73.519	0.07035
10	0.9	0.6	-1	1	0.03	0.04	0.4	0.8	25	1	87.404	0.07769
10	0.7	0.6	-1	1	0.03	0.04	0.4	0.8	25	1	73.091	0.06003
10	0.8	0.6	-1	1	0.03	0.04	0.4	0.8	25	1	79.971	0.06897
10	0.9	0.6	-1	1	0.03	0.04	0.4	0.9	25	1	87.737	0.08273
10	0.01	0.6	-1	1	0.03	0.04	0.4	0.6	25	1	42.242	0.02997
10	0.8	0.6	-1	1	0.03	0.04	0.4	0.9	25	1	79.404	0.06985
10	0.9	0.3	-1	1	0.03	0.04	0.4	0.1	25	1	55.339	0.06472
10	0.1	0.6	-1	1	0.03	0.04	0.4	0.9	25	1	41.019	0.01135
10	0.99	0.5	-1	1	0.03	0.04	0.4	0.5	25	1	76.357	0.07322
10	0.1	0.5	-1	1	0.03	0.04	0.4	0.4	25	1	49.017	0.0618
10	0.9	0.4	-1	1	0.03	0.04	0.4	0.3	25	1	62.236	0.07045
10	0.1	0.5	-1	1	0.03	0.04	0.4	0.5	25	1	47.396	0.05147
10	0.99	0.6	-1	1	0.03	0.04	0.4	0.6	25	1	94.107	0.07445
10	0.1	0.6	-1	1	0.03	0.04	0.4	0.6	25	1	46.035	0.03841
10	0.9	0.3	-1	1	0.03	0.04	0.4	0.2	25	1	54.8	0.06924
10	0.2	0.5	-1	1	0.03	0.04	0.4	0.5	25	1	50.383	0.0543
10	0.8	0.3	-1	1	0.03	0.04	0.4	0.1	25	1	56.369	0.07273
10	0.6	0.3	-1	1	0.03	0.04	0.4	0.2	25	1	55.355	0.07825
10	0.2	0.6	-1	1	0.03	0.04	0.4	0.6	25	1	50.173	0.04282
10	0.8	0.5	-1	1	0.03	0.04	0.4	0.4	25	1	71.239	0.07185
10	0.3	0.6	-1	1	0.03	0.04	0.4	0.6	25	1	53.753	0.0472
10	0.3	0.5	-1	1	0.03	0.04	0.4	0.5	25	1	53.073	0.05757
10	0.8	0.3	-1	1	0.03	0.04	0.4	0.2	25	1	56.171	0.07573
10	0.2	0.5	-1	1	0.03	0.04	0.4	0.4	25	1	51.1	0.0613
10	0.3	0.5	-1	1	0.03	0.04	0.4	0.4	25	1	54.505	0.06426
10	0.4	0.5	-1	1	0.03	0.04	0.4	0.5	25	1	56.605	0.06186
10	0.7	0.3	-1	1	0.03	0.04	0.4	0.2	25	1	55.993	0.0794
10	0.8	0.4	-1	1	0.03	0.04	0.4	0.3	25	1	62.439	0.07368
10	0.3	0.6	-1	1	0.03	0.04	0.4	0.8	25	1	50.513	0.03133
10	0.9	0.5	-1	1	0.03	0.04	0.4	0.5	25	1	72.99	0.07458
10	0.5	0.5	-1	1	0.03	0.04	0.4	0.5	25	1	60.185	0.06647
10	0.7	0.5	-1	1	0.03	0.04	0.4	0.5	25	1	67.151	0.07238
10	0.7	0.4	-1	1	0.03	0.04	0.4	0.3	25	1	61.056	0.07586
10	0.5	0.6	-1	1	0.03	0.04	0.4	0.6	25	1	63.642	0.0575
10	0.4	0.5	-1	1	0.03	0.04	0.4	0.4	25	1	57.674	0.06676
10	0.5	0.5	-1	1	0.03	0.04	0.4	0.4	25	1	60.596	0.06842
10	0.4	0.6	-1	1	0.03	0.04	0.4	0.8	25	1	55.539	0.03863
10	0.1	0.4	-1	1	0.03	0.04	0.4	0.3	25	1	49.42	0.07033
10	0.6	0.3	-1	1	0.03	0.04	0.4	0.1	25	1	55.874	0.08022
10	0.01	0.4	-1	1	0.03	0.04	0.4	0.3	25	1	48.299	0.06955
10	0.2	0.4	-1	1	0.03	0.04	0.4	0.3	25	1	51.585	0.07334
10	0.3	0.2	-1	1	0.03	0.04	0.4	0	25	1	52.012	0.09198
10	0.8	0.5	-1	1	0.03	0.04	0.4	0.5	25	1	70.082	0.0723
10	0.9	0.6	-1	1	0.03	0.04	0.4	0.6	25	1	87.377	0.07209
10	0.2	0.3	-1	1	0.03	0.04	0.4	0.1	25	1	52.397	0.08741
10	0.3	0.4	-1	1	0.03	0.04	0.4	0.3	25	1	53.471	0.07238
10	0.5	0.3	-1	1	0.03	0.04	0.4	0.1	25	1	55.284	0.08279
10	0.3	0.3	-1	1	0.03	0.04	0.4	0.2	25	1	52.375	0.08243
10	0.8	0.6	-1	1	0.03	0.04	0.4	0.6	25	1	80.87	0.0699
10	0.4	0.3	-1	1	0.03	0.04	0.4	0.2	25	1	53.461	0.08111
10	0.5	0.3	-1	1	0.03	0.04	0.4	0.2	25	1	54.592	0.08035
10	0.7	0.5	-1	1	0.03	0.04	0.4	0.4	25	1	67.445	0.07156
10	0.2	0.2	-1	1	0.03	0.04	0.4	0	25	1	52.226	0.09302
10	0.4	0.3	-1	1	0.03	0.04	0.4	0.1	25	1	53.833	0.08425
10	0.6	0.5	-1	1	0.03	0.04	0.4	0.4	25	1	64.394	0.07099
10	0.1	0.3	-1	1	0.03	0.04	0.4	0.1	25	1	51.727	0.08911
10	0.3	0.3	-1	1	0.03	0.04	0.4	0.1	25	1	53.215	0.08589
10	0.5	0.2	-1	1	0.03	0.04	0.4	0	25	1	52.211	0.08493
10	0.6	0.6	-1	1	0.03	0.04	0.4	0.6	25	1	68.092	0.06052
10	0.4	0.2	-1	1	0.03	0.04	0.4	0	25	1	52.408	0.08868
10	0.01	0.3	-1	1	0.03	0.04	0.4	0.1	25	1	51.926	0.09339
10	0.01	0.3	-1	1	0.03	0.04	0.4	0.2	25	1	50.661	0.08318
10	0.7	0.6	-1	1	0.03	0.04	0.4	0.6	25	1	74.51	0.0657
10	0.6	0.4	-1	1	0.03	0.04	0.4	0.3	25	1	58.9	0.0749
10	0.5	0.4	-1	1	0.03	0.04	0.4	0.3	25	1	58.065	0.07613
10	0.1	0.2	-1	1	0.03	0.04	0.4	0	25	1	53.477	0.0967
10	0.01	0.2	-1	1	0.03	0.04	0.4	0	25	1	55.486	0.10342
10	0.8	0.2	-1	1	0.03	0.04	0.4	0	25	1	50.854	0.07124
10	0.4	0.6	-1	1	0.03	0.04	0.4	0.6	25	1	57.791	0.05244
10	0.6	0.5	-1	1	0.03	0.04	0.4	0.5	25	1	63.712	0.06843
10	0.1	0.3	-1	1	0.03	0.04	0.4	0.2	25	1	50.746	0.08186
50	0.3	0.6	-1	1	0.03	0.04	0.4	0.8	25	1	394.71	0
50	0.01	0.6	-1	1	0.03	0.04	0.4	0.8	25	1	256.37	0
50	0.01	0.6	-1	1	0.03	0.04	0.4	0.9	25	1	233.77	0
50	0.4	0.6	-1	1	0.03	0.04	0.4	0.8	25	1	459.62	0
50	0.01	0.5	-1	1	0.03	0.04	0.4	0.5	25	1	377.43	0
50	0.1	0.6	-1	1	0.03	0.04	0.4	0.9	25	1	281.99	0
50	0.01	0.6	-1	1	0.03	0.04	0.4	0.7	25	1	287.31	0
50	0.1	0.6	-1	1	0.03	0.04	0.4	0.8	25	1	301.28	0
50	0.2	0.6	-1	1	0.03	0.04	0.4	0.9	25	1	314.15	0
50	0.2	0.6	-1	1	0.03	0.04	0.4	0.8	25	1	347.14	0
50	0.1	0.6	-1	1	0.03	0.04	0.4	0.7	25	1	337.98	0
50	0.01	0.6	-1	1	0.03	0.04	0.4	0.6	25	1	331.23	0
50	0.2	0.6	-1	1	0.03	0.04	0.4	0.7	25	1	381.04	0
50	0.3	0.6	-1	1	0.03	0.04	0.4	0.9	25	1	362.99	0
50	0.1	0.6	-1	1	0.03	0.04	0.4	0.6	25	1	385.48	0
50	0.2	0.5	-1	1	0.03	0.04	0.4	0.5	25	1	487.66	2e-05
50	0.4	0.6	-1	1	0.03	0.04	0.4	0.9	25	1	419.77	0
50	0.3	0.6	-1	1	0.03	0.04	0.4	0.7	25	1	446.91	0
50	0.3	0.5	-1	1	0.03	0.04	0.4	0.5	25	1	543.63	9e-05
50	0.2	0.6	-1	1	0.03	0.04	0.4	0.6	25	1	431.56	1e-05
50	0.7	0.6	-1	1	0.03	0.04	0.4	0.8	25	1	835.29	0.00014
50	0.3	0.6	-1	1	0.03	0.04	0.4	0.6	25	1	495.1	1e-05
50	0.4	0.6	-1	1	0.03	0.04	0.4	0.7	25	1	511.71	3e-05
50	0.5	0.6	-1	1	0.03	0.04	0.4	0.9	25	1	502.59	0
50	0.5	0.6	-1	1	0.03	0.04	0.4	0.8	25	1	544.54	2e-05
50	0.1	0.5	-1	1	0.03	0.04	0.4	0.5	25	1	438.4	2e-05
50	0.5	0.6	-1	1	0.03	0.04	0.4	0.7	25	1	597.19	1e-05
50	0.99	0.3	-1	1	0.03	0.04	0.4	0.1	25	1	647.91	0.00065
50	0.01	0.5	-1	1	0.03	0.04	0.4	0.4	25	1	449.01	7e-05
50	0.4	0.6	-1	1	0.03	0.04	0.4	0.6	25	1	563.14	4e-05
50	0.1	0.5	-1	1	0.03	0.04	0.4	0.4	25	1	498.88	0.00016
50	0.99	0.3	-1	1	0.03	0.04	0.4	0.2	25	1	807.1	0.00184
50	0.6	0.6	-1	1	0.03	0.04	0.4	0.9	25	1	615.46	0
50	0.6	0.5	-1	1	0.03	0.04	0.4	0.4	25	1	876.91	0.00103
50	0.5	0.6	-1	1	0.03	0.04	0.4	0.6	25	1	648.66	3e-05
50	0.6	0.6	-1	1	0.03	0.04	0.4	0.8	25	1	663.26	2e-05
50	0.2	0.5	-1	1	0.03	0.04	0.4	0.4	25	1	571.69	0.00022
50	0.4	0.5	-1	1	0.03	0.04	0.4	0.5	25	1	610.75	9e-05
50	0.99	0.2	-1	1	0.03	0.04	0.4	0	25	1	529.54	0.00032
50	0.4	0.4	-1	1	0.03	0.04	0.4	0.3	25	1	766.63	0.0016
50	0.7	0.6	-1	1	0.03	0.04	0.4	0.9	25	1	782.15	5e-05
50	0.5	0.5	-1	1	0.03	0.04	0.4	0.5	25	1	691.2	0.00028
50	0.4	0.5	-1	1	0.03	0.04	0.4	0.4	25	1	681.41	0.00038
50	0.6	0.6	-1	1	0.03	0.04	0.4	0.6	25	1	761.94	0.00022
50	0.99	0.4	-1	1	0.03	0.04	0.4	0.3	25	1	1016.1	0.00252
50	0.1	0.4	-1	1	0.03	0.04	0.4	0.3	25	1	599.73	0.00073
50	0.5	0.4	-1	1	0.03	0.04	0.4	0.3	25	1	821.29	0.00171
50	0.01	0.3	-1	1	0.03	0.04	0.4	0.2	25	1	670.71	0.0026
50	0.2	0.3	-1	1	0.03	0.04	0.4	0.2	25	1	735.61	0.00286
50	0.5	0.5	-1	1	0.03	0.04	0.4	0.4	25	1	782.14	0.00069
50	0.6	0.6	-1	1	0.03	0.04	0.4	0.7	25	1	712.54	2e-05
50	0.6	0.5	-1	1	0.03	0.04	0.4	0.5	25	1	824.29	0.00053
50	0.99	0.5	-1	1	0.03	0.04	0.4	0.4	25	1	1285.7	0.00348
50	0.7	0.6	-1	1	0.03	0.04	0.4	0.6	25	1	928.18	0.0004
50	0.8	0.2	-1	1	0.03	0.04	0.4	0	25	1	767.42	0.00239
50	0.7	0.3	-1	1	0.03	0.04	0.4	0.1	25	1	912.93	0.0031
50	0.3	0.3	-1	1	0.03	0.04	0.4	0.1	25	1	871.41	0.00527
50	0.01	0.4	-1	1	0.03	0.04	0.4	0.3	25	1	566.99	0.00054
50	0.7	0.5	-1	1	0.03	0.04	0.4	0.5	25	1	942.38	0.001
50	0.7	0.5	-1	1	0.03	0.04	0.4	0.4	25	1	970.03	0.00113
50	0.99	0.5	-1	1	0.03	0.04	0.4	0.5	25	1	1578.5	0.00729
50	0.8	0.6	-1	1	0.03	0.04	0.4	0.9	25	1	1115.1	0.00045
50	0.9	0.2	-1	1	0.03	0.04	0.4	0	25	1	662.48	0.00111
50	0.3	0.5	-1	1	0.03	0.04	0.4	0.4	25	1	617.59	0.00039
50	0.9	0.5	-1	1	0.03	0.04	0.4	0.4	25	1	1176.2	0.00249
50	0.8	0.4	-1	1	0.03	0.04	0.4	0.3	25	1	1030.9	0.00245
50	0.9	0.3	-1	1	0.03	0.04	0.4	0.1	25	1	782.57	0.0015
50	0.3	0.4	-1	1	0.03	0.04	0.4	0.3	25	1	706.75	0.00126
50	0.8	0.6	-1	1	0.03	0.04	0.4	0.8	25	1	1112.9	0.00064
50	0.2	0.4	-1	1	0.03	0.04	0.4	0.3	25	1	650.14	0.00101
50	0.9	0.6	-1	1	0.03	0.04	0.4	0.6	25	1	1491.7	0.00267
50	0.7	0.6	-1	1	0.03	0.04	0.4	0.7	25	1	890.93	0.00015
50	0.8	0.6	-1	1	0.03	0.04	0.4	0.6	25	1	1159.9	0.00091
50	0.8	0.5	-1	1	0.03	0.04	0.4	0.4	25	1	1112	0.00167
50	0.9	0.4	-1	1	0.03	0.04	0.4	0.3	25	1	1041.7	0.00288
50	0.2	0.3	-1	1	0.03	0.04	0.4	0.1	25	1	830.07	0.0058
50	0.7	0.4	-1	1	0.03	0.04	0.4	0.3	25	1	960.8	0.00237
50	0.8	0.6	-1	1	0.03	0.04	0.4	0.7	25	1	1153.1	0.00082
50	0.9	0.3	-1	1	0.03	0.04	0.4	0.2	25	1	880.79	0.0022
50	0.1	0.3	-1	1	0.03	0.04	0.4	0.2	25	1	691.12	0.0028
50	0.6	0.2	-1	1	0.03	0.04	0.4	0	25	1	910.59	0.00506
50	0.8	0.5	-1	1	0.03	0.04	0.4	0.5	25	1	1116.3	0.00184
50	0.5	0.2	-1	1	0.03	0.04	0.4	0	25	1	898.16	0.00667
50	0.99	0.6	-1	1	0.03	0.04	0.4	0.6	25	1	2020.2	0.00751
50	0.9	0.5	-1	1	0.03	0.04	0.4	0.5	25	1	1276.9	0.00323
50	0.6	0.4	-1	1	0.03	0.04	0.4	0.3	25	1	902.98	0.00203
50	0.8	0.3	-1	1	0.03	0.04	0.4	0.2	25	1	943.14	0.00312
50	0.8	0.3	-1	1	0.03	0.04	0.4	0.1	25	1	874.04	0.00262
50	0.3	0.3	-1	1	0.03	0.04	0.4	0.2	25	1	789.01	0.00342
50	0.4	0.3	-1	1	0.03	0.04	0.4	0.2	25	1	820.01	0.00325
50	0.9	0.6	-1	1	0.03	0.04	0.4	0.7	25	1	1592.6	0.0035
50	0.7	0.3	-1	1	0.03	0.04	0.4	0.2	25	1	930.09	0.00343
50	0.5	0.3	-1	1	0.03	0.04	0.4	0.2	25	1	867.41	0.00357
50	0.6	0.3	-1	1	0.03	0.04	0.4	0.2	25	1	914.05	0.00335
50	0.5	0.3	-1	1	0.03	0.04	0.4	0.1	25	1	927.92	0.00477
50	0.6	0.3	-1	1	0.03	0.04	0.4	0.1	25	1	920.11	0.00431
50	0.99	0.6	-1	1	0.03	0.04	0.4	0.8	25	1	2705.5	0.02434
50	0.99	0.6	-1	1	0.03	0.04	0.4	0.7	25	1	2389.8	0.01484
50	0.9	0.6	-1	1	0.03	0.04	0.4	0.8	25	1	1683.8	0.00423
50	0.4	0.3	-1	1	0.03	0.04	0.4	0.1	25	1	918.93	0.00526
50	0.7	0.2	-1	1	0.03	0.04	0.4	0	25	1	841.21	0.00382
50	0.01	0.3	-1	1	0.03	0.04	0.4	0.1	25	1	858.08	0.0082
50	0.9	0.6	-1	1	0.03	0.04	0.4	0.9	25	1	1827.6	0.0054
50	0.01	0.2	-1	1	0.03	0.04	0.4	0	25	1	977.1	0.01676
50	0.99	0.6	-1	1	0.03	0.04	0.4	0.9	25	1	2991.9	0.03587
50	0.4	0.2	-1	1	0.03	0.04	0.4	0	25	1	916.24	0.00834
50	0.3	0.2	-1	1	0.03	0.04	0.4	0	25	1	900.37	0.00862
50	0.1	0.2	-1	1	0.03	0.04	0.4	0	25	1	907.77	0.01224
50	0.2	0.2	-1	1	0.03	0.04	0.4	0	25	1	932.2	0.0112
50	0.1	0.3	-1	1	0.03	0.04	0.4	0.1	25	1	818.07	0.00649
